# Supplementary material
Source: PubMed Central journal article supplement (PMC6560142)
Supplement: JB.00195-19-s0001.pdf [file JB.00195-19-s0001.pdf]

## Supplementary Information

**TABLE S1** Primers used in this study.

| Primer Name | Description                          | Primer Sequence                             |
|-------------|--------------------------------------|---------------------------------------------|
| KA1061      | 5'-pUC19<br><i>LmCFSANlit2</i> for   | CGGTACCCGGGGATCCCTCCTTAGGCTATTC             |
| KA1062      | pUC19 <i>LmCFSANlit2</i><br>rev-3'   | CCATGATTACGCCAAGCTTCATTATATTAAGG            |
| KA1063      | 5'-pUC19<br><i>EfTX1342lit2</i> for  | CGGTACCCGGGGATCCCGCTAGTGGGAACATC            |
| KA1064      | pUC19 <i>EfTX1342lit2</i><br>rev-3'  | CCATGATTACGCCAAGCTTCTCTCAAAGTCATTCC         |
| KA1065      | 5'- <i>LmCFSANlit2</i><br>upstream   | GACGGCCAGTGAATTCATGTCCGTGCCCTTTATG          |
| KA1066      | <i>LmCFSANlit2</i><br>upstream-3'    | TAATAGAAATAGCATGC                           |
| KA1067      | 5'- <i>LmCFSANlit2</i><br>downstream | GCATGCTATTTCTATTAACCTTTGACAACAATTCATCAT     |
| KA1068      | <i>LmCFSANlit2</i><br>downstream-3'  | TGATTACGCCAAGCTGGACATTCTACTTGAGA            |
| KA1155      | 5'-P <sub>xyI</sub>                  | CAAGGAGGTGAATGTACAATGAAAAAAGCATGC           |
| KA1156      | P <sub>xyI</sub> -3'                 | CGGCCGGTACCGGATCCCTCCTTAGGCTATTC            |
| TM1172      | 5'-pKFC ori QC for                   | GTGTATTAGCACCGTTATTATATCATG                 |
| TM1173      | pKFC ori QC rev-3'                   | CTTTTTTCATCCTACCTTCTGTATCAG                 |
| TM1174      | 5'-pKFC plas for                     | GTAGGATGAAAAAAGAGCATTATCATATTC              |
| TM1175      | pKFC plas rev-3'                     | ACGGTGCTAATACACTTAACAAAATTTAG               |
| KA1511      | 5'- <i>LmCFSANlit2</i><br>qPCR       | GTCTCAGATCGCGGTATAAA                        |
| KA1512      | <i>LmCFSANlit2</i> qPCR-<br>3'       | GCTACTCGTAGAAAGAAGCA                        |
| KA1515      | 5'- <i>LmCFSANcopA</i><br>qPCR       | TCTTTGCCGAACAACACTACC                       |
| KA1516      | <i>LmCFSANcopA</i><br>qPCR-3'        | TGCCATCACCAACGAATG                          |
| TM1554      | <i>EfTX1342lit2</i> T7-3'            | GTTTATAATACGACTCACTATAGGGAGACAATCGTTGTTAGTG |
| TM1555      | 5'- <i>EfTX1342lit2</i> T7           | GTCTTTGCTTTGTCGCTTGC                        |
| TM1556      | <i>EfTX1342copB2</i> T7-<br>3'       | GTTTATAATACGACTCACTATAGGGAGAAGCATGTGCCACCAG |
| TM1557      | 5'- <i>EfTX1342copB2</i><br>T7       | CCAATGTCAATTTGGCTACAG                       |

|         |                                               |                                                                                     |
|---------|-----------------------------------------------|-------------------------------------------------------------------------------------|
| TXM1560 | <i>LmCFSANlit2</i> T7-3'                      | GTTTATAATACGACTCACTATAGGGAGAGTCAAAGTAGAAACAC                                        |
| TXM1561 | 5'- <i>LmCFSANlit2</i> T7                     | CAAACCTGGAGTAGATCTCAAG                                                              |
| TM1564  | <i>EfTX1342lit1</i> T7-3'                     | GTTTATAATACGACTCACTATAGGGAGAAAATAAAGGACACTAGG                                       |
| TM1565  | 5'- <i>EfTX1342lit1</i> T7                    | GCGTTTAAGGGAAACACTTGGAC                                                             |
| KA1566  | <i>LmCFSANlgt2</i> T7-3'                      | GTTTATAATACGACTCACTATAGGGAGACAATTTCTCCATAGG                                         |
| KA1567  | 5'- <i>LmCFSANlgt2</i> T7                     | GCTAATAGAAGAGCAAAGCGTG                                                              |
| TM1568  | <i>EfTX1342copA</i> T7-3'                     | GTTTATAATACGACTCACTATAGGGAGAGTCGCATGTGTCATTGG                                       |
| TM1569  | 5'- <i>EfTX1342copA</i> T7                    | CTGTGAACCAATTATCTGGTGTTTC                                                           |
| KA1576  | 5'- <i>EfTX1342gyrA</i><br>qPCR               | TTCCAACAGGCGGTTTAG                                                                  |
| KA1577  | <i>EfTX1342gyrA</i><br>qPCR-3'                | TCCATTCGGCATTTCAGTC                                                                 |
| TM1594  | 5'- <i>EfTX1342lit2</i><br>qPCR               | GTCGCTTGCAATTTCAAGTTAC                                                              |
| TM1595  | <i>EfTX1342lit2</i> qPCR-<br>3'               | GGATTGTTCAAGTAGTTCATC                                                               |
| TM1596  | 5'- <i>EfTX1342lit1</i><br>qPCR               | GGCTTTAAGTATCACGATCAC                                                               |
| TM1597  | <i>EfTX1342lit1</i> qPCR-<br>3'               | AATCAAGGTCACACGATCAAC                                                               |
| TM1598  | 5'- <i>EfTX1342copA</i><br>qPCR               | ACGATTGAAAAAGCTGTGAAC                                                               |
| TM1599  | <i>EfTX1342copA</i><br>qPCR-3'                | ATAACCTGCATCCGTAAGT                                                                 |
| KA1604  | <i>LmCFSANcopY</i> T7-3'                      | GTTTATAATACGACTCACTATAGGGAGACATTGAATTCCTCCG                                         |
| KA1605  | 5'- <i>LmCFSANcopY</i> T7                     | CAGGTATCGAATTCAGAG                                                                  |
| KA1628  | 5'- <i>LmCFSANlgt1</i> T7                     | GCGCTAATTGGTGACG                                                                    |
| KA1629  | <i>LmCFSANlgt1</i> T7-3'                      | GTTTATAATACGACTCACTATAGGGAGACTTCCAAATGAATACC                                        |
| TM1786  | 5'- <i>LmCFSANlit2</i><br>P <sub>Gram+</sub>  | TAGAAGTAGTGGATCAACGACGGCCAGTGAATTGACAAA<br>AATTGGTATATATGATATAATATAATCAAGGAGTGATCTA |
| TM1787  | <i>LmCFSANlit2</i> P <sub>Gram+</sub> -<br>3' | AGGGAACAAAAGCTGACCATCCCTCCTTAGG                                                     |
| TM1800  | 5'- <i>LmCFSANlit2</i><br>P <sub>pen</sub>    | AACAGCGCGTGTATTAGGAGTGATCTAATAT                                                     |
| TM1801  | <i>LmCFSANlit2</i> P <sub>pen</sub> -<br>3'   | ACGGCCAGTGAATTAAGCTAATTCCGGTGG                                                      |
| TM1841  | 5'- <i>LmCFSANcopY</i><br>qPCR                | CAGGTATCGAATTCAGAGTTAGATG                                                           |
| TM1842  | <i>LmCFSANcopY</i><br>qPCR-3'                 | CCAACCTATTACGCTCTTGATTC                                                             |

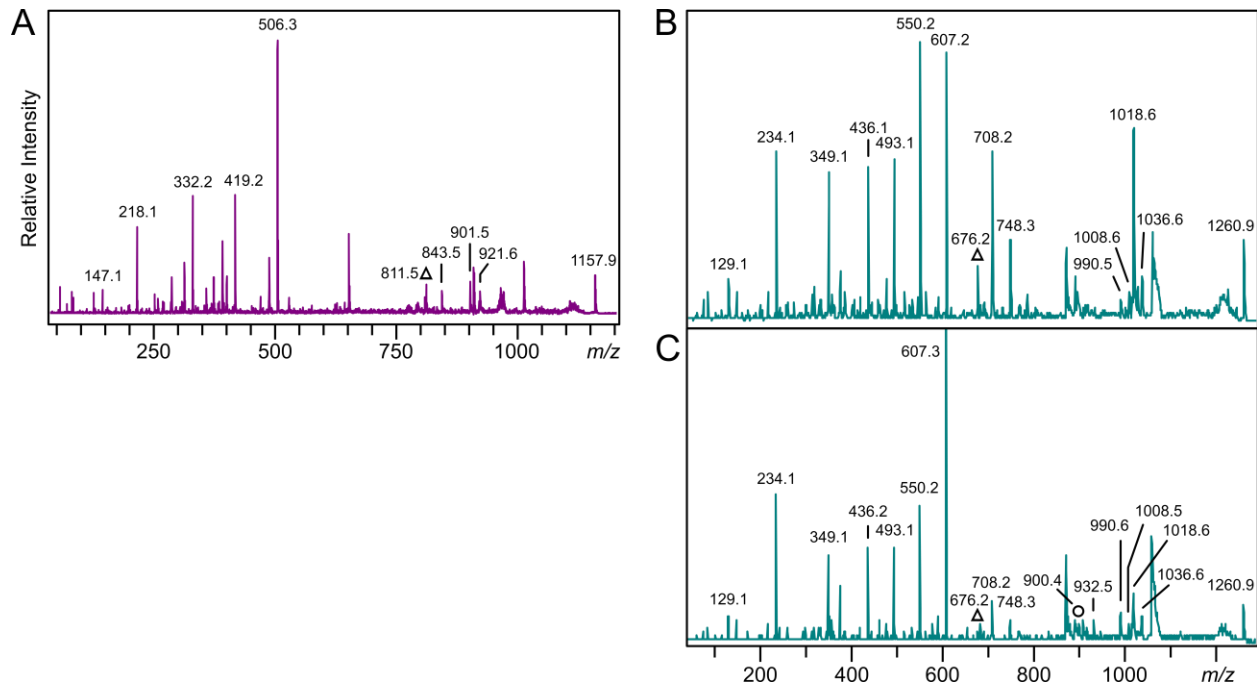

**FIG S1** MALDI-TOF MS/MS spectrum of the protonated parent ions  $m/z$  1157.9 and 1260.9. (A) MS/MS spectrum of the protonated parent ion  $m/z$  1157.9 of Lpp purified from strain KA811 expressing *E. faecalis* TX1342 *lit2*. MS/MS spectra of the protonated parent ion  $m/z$  1260.9 of the *L. monocytogenes* lipoprotein KO07\_11695 from strain KA847 (ATCC 19115) (B), and KA849 (ATCC 19115 +  $pP_{xyI}Lmlit2$ ) plus 2% xylose (C). The diagnostic dehydroalanyl ions for the diacylglycerol-modified (triangle) and the lyso (circle) lipopeptide are indicated.

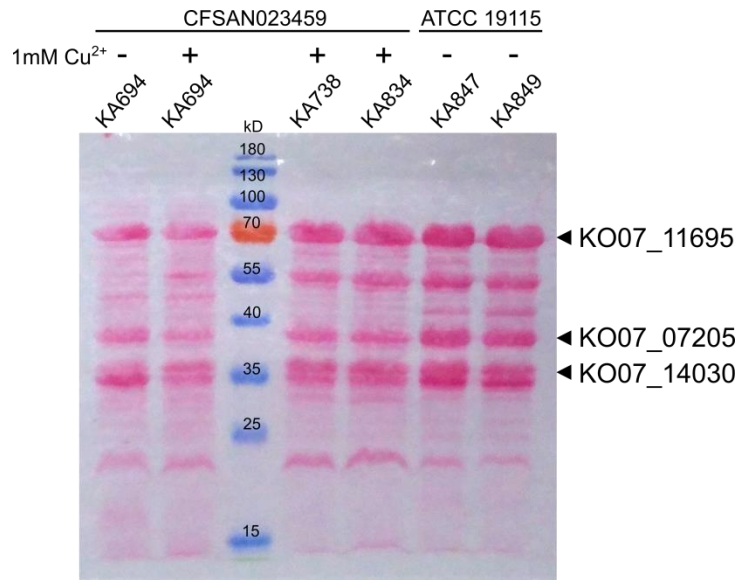

**FIG S2** Lipoprotein profiles from *Listeria monocytogenes* CFSAN023459 and ATCC 19115. Using the Triton X-114 phase partitioning method, lipoproteins were enriched from the following *L. monocytogenes* strains grown in HTM+ with the indicated amount of  $\text{CuCl}_2$ : KA694 (CFSAN023459) without and with 1 mM  $\text{CuCl}_2$ , KA738 (CFSAN023459  $\Delta lit2$ ) with 1 mM  $\text{CuCl}_2$ , KA834 (CFSAN023459  $\Delta lit2 + plit2$ ) with 1 mM  $\text{CuCl}_2$  plus 2% xylose, KA847 (ATCC 19115) in HTM+only, and KA849 (ATCC 19115 + *pxyllit2*) in HTM+ plus 2% xylose. The Triton X-114 phases were separated by SDS-PAGE, transferred to nitrocellulose membrane, and visualized by Ponceau S staining. The lipoproteins chosen for analysis by MALDI-TOF are indicated.

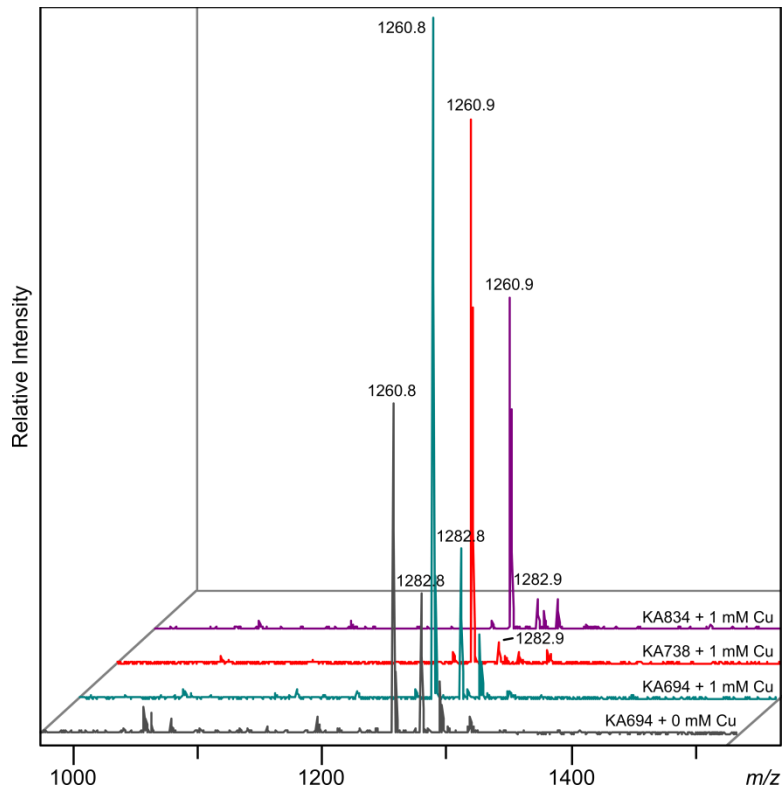

**FIG S3** MALDI-TOF MS of KO07\_11695, a predicted peptide ABC transporter substrate-binding lipoprotein. The stacked parent MS spectra of the  $m/z$  1260 ion region corresponding to the  $N$ -terminal lipopeptide of KO07\_11695 from *L. monocytogenes* CFSAN023459 are shown. The natural abundance of the sodium adduct  $m/z$  1282 is also indicated. The lipoprotein was purified from KA694 (CFSAN023459) grown without and with 1 mM  $\text{CuCl}_2$ , KA738 (CFSAN023459  $\Delta lit2$ ) grown with 1 mM  $\text{CuCl}_2$ , and KA834 (CFSAN023459  $\Delta lit2 + pxyllit2$ ) grown with 1 mM  $\text{CuCl}_2$  plus 2% xylose.

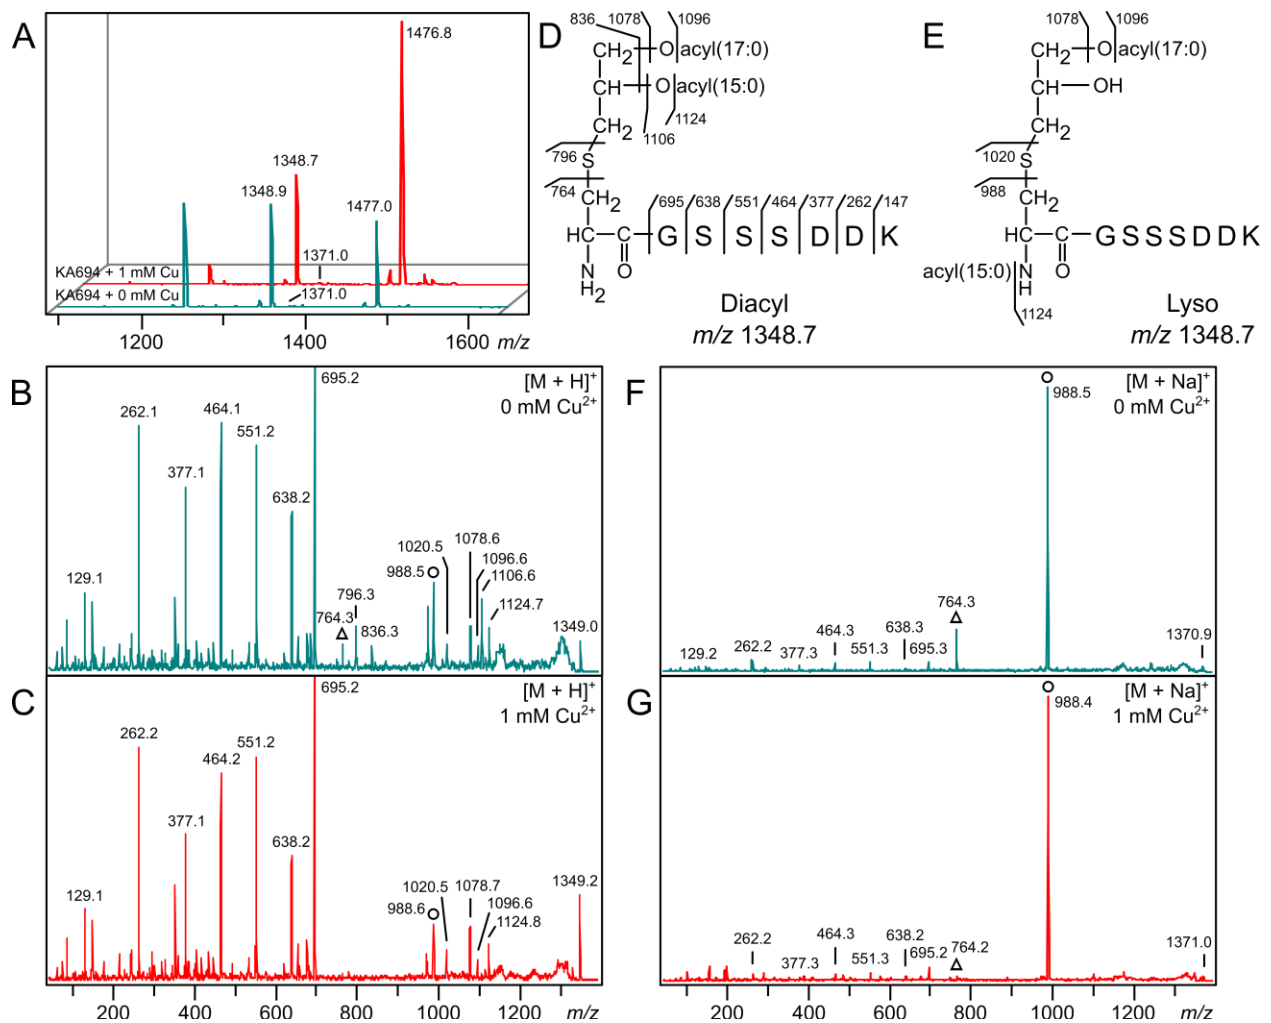

**FIG S4** MALDI-TOF MS and MS/MS of KO07\_07205, a predicted PnrA-like lipoprotein. (A) The stacked parent MS spectra of the  $m/z$  1348 ion region corresponding to the N-terminal lipopeptide of KO07\_07205 from *L. monocytogenes* CFSAN023459 (KA694) grown with (red traces) and without (turquoise traces) 1 mM CuCl $_2$  are shown. The natural abundance of the sodium adduct  $m/z$  1370 is also indicated. (B, F) The MS/MS spectra of the protonated  $m/z$  1349.0 (B) and the sodiated  $m/z$  1370.9 (F) parent ions reveal both diacylglycerol-modified and lyso-form lipopeptides when KA694 is grown without CuCl $_2$ . (C, G) The MS/MS spectra of the protonated  $m/z$  1349.2 (C) and the sodiated  $m/z$  1371.0 (G) parent ions reveal near-conversion to the lyso form when exogenous CuCl $_2$  is added to the growth media. (D, E) The elucidated structures of the diacylglycerol-modified (D) and the lyso-form (E) N-terminal lipopeptides are shown. The diagnostic dehydroalanyl ions for the diacylglycerol-modified (triangle) and the lyso (circle) lipopeptide are indicated.

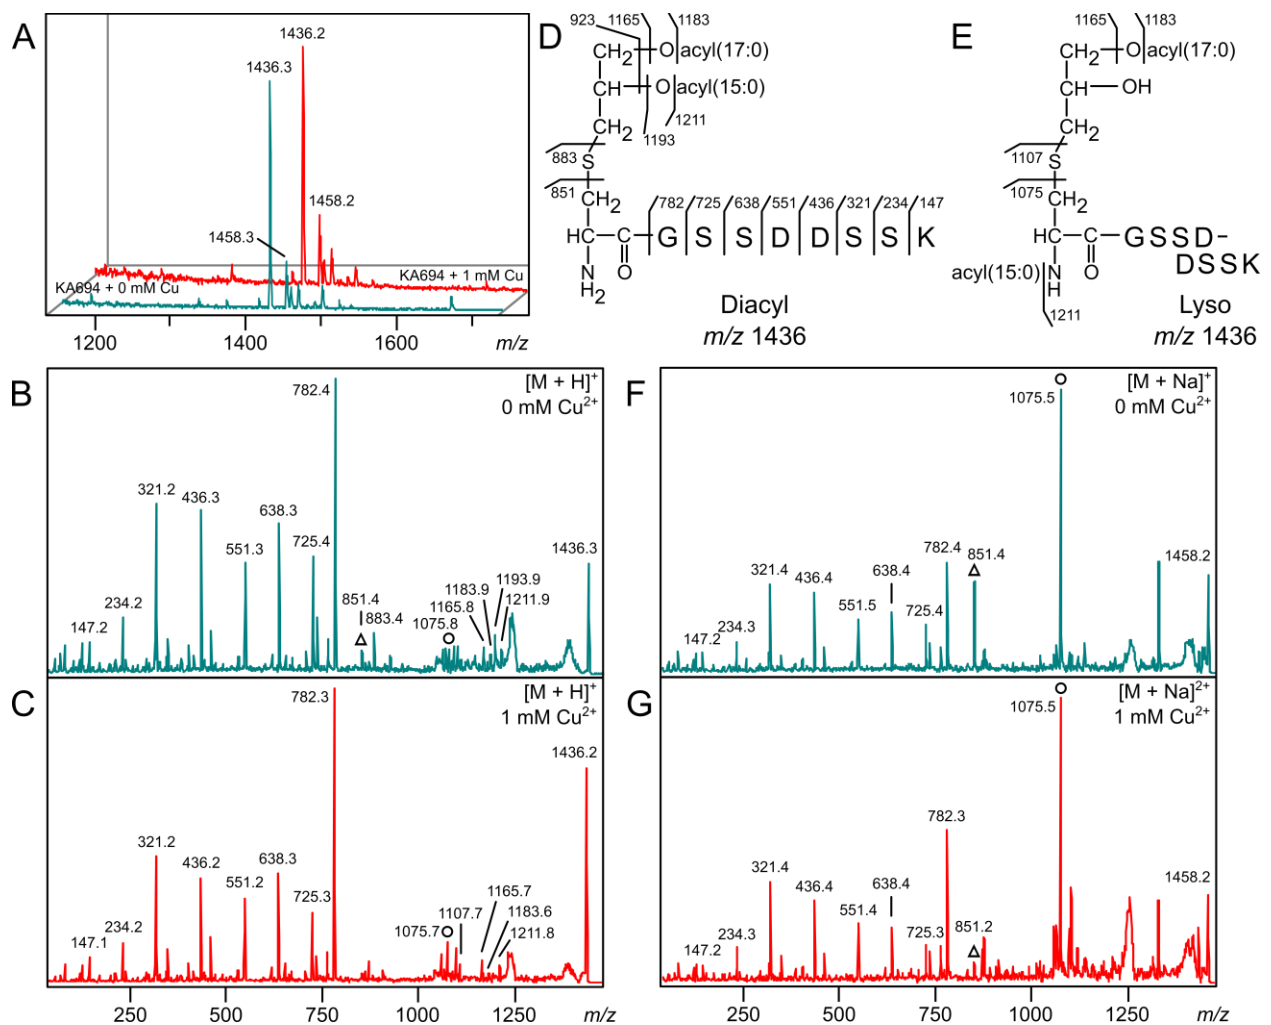

**FIG S5** MALDI-TOF MS and MS/MS of KO07\_14030, a predicted FMN-binding lipoprotein. (A) The stacked parent MS spectra of the  $m/z$  1436 ion region corresponding to the N-terminal lipopeptide of KO07\_14030 from *L. monocytogenes* CFSAN023459 (KA694) grown with and without 1 mM  $CuCl_2$  are shown. The natural abundance of the sodium adduct  $m/z$  1458 is also indicated. (B, F) The MS/MS spectra of the protonated  $m/z$  1436.3 (B) and the sodiated  $m/z$  1458.2 (F) parent ions reveal both diacylglycerol-modified and lyso-form lipopeptides when KA694 is grown without copper. (C, G) The MS/MS spectra of the protonated  $m/z$  1436.2 (C) and the sodiated  $m/z$  1458.2 (G) parent ions reveal near-conversion to the lyso form when exogenous  $CuCl_2$  is added to the growth media. (D, E) The elucidated structures of the diacylglycerol-modified (D) and the lyso-form (E) N-terminal lipopeptides are shown. The diagnostic dehydroalanyl ions for the diacylglycerol-modified (triangle) and the lyso (circle) lipopeptide are indicated.

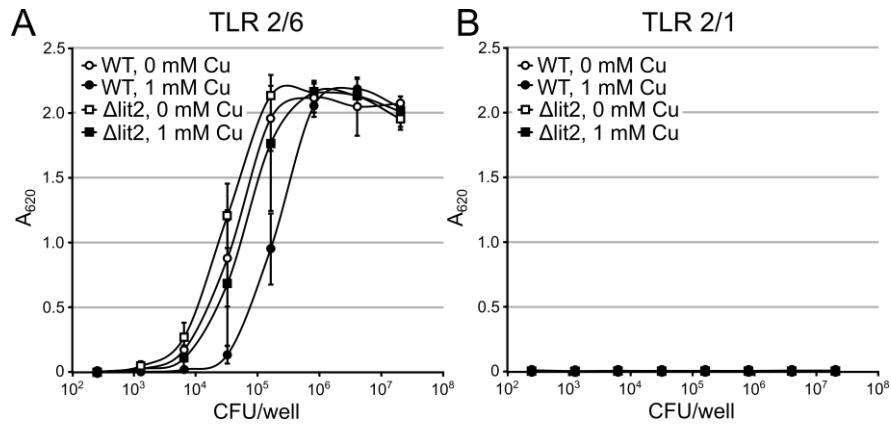

**Fig S6** TLR2 response to whole bacteria. (A) HEK-Blue-TLR2/6 cells were exposed to 5-fold dilutions of heat-inactivated, whole bacteria cells of *L. monocytogenes* CFSAN023459 (WT) grown with or without 1 mM  $\text{CuCl}_2$ , as well as the derivative  $\Delta lit2$  cells grown with or without 1 mM  $\text{CuCl}_2$ . (B) HEK-Blue-TLR2/1 cells were exposed to the same bacterial cell preparations as in panel A. The data are shown as the mean  $\pm$  the standard deviation of three biological replicates.



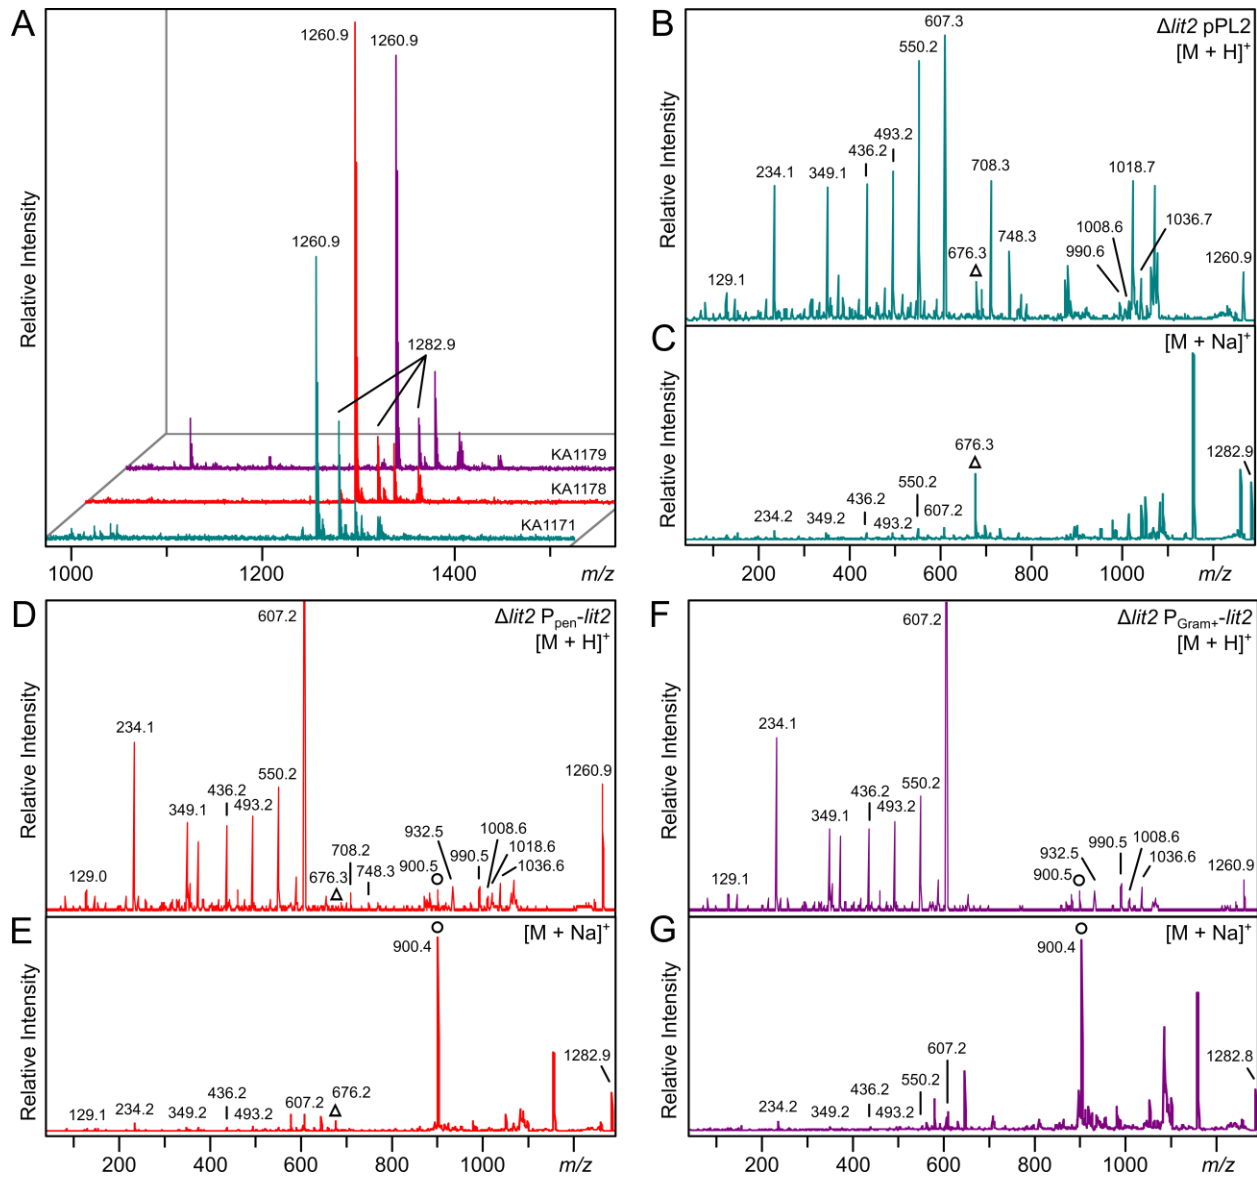

**FIG S7** MALDI-TOF MS and MS/MS of KO07\_11695 from strains KA1171, KA1178, and KA1179. (A) The stacked parent MS spectra of the  $m/z$  1260 ion region corresponding to the  $N$ -terminal lipopeptide of KO07\_11695 from *L. monocytogenes* CFSAN023459 are shown. The natural abundance of the sodium adduct  $m/z$  1282 is also indicated. (B, C) The MS/MS spectra of the protonated  $m/z$  1260 (B) and sodiated  $m/z$  1282 (C) parent ions of strain KA1171 ( $\Delta lit2 attB::pPL2$ ). (D, E) The MS/MS spectra of the protonated  $m/z$  1260 (D) and sodiated  $m/z$  1282 (E) parent ions of strain KA1178 ( $\Delta lit2 attB::pPL2-P_{pen}-lit2$ ). (F, G) The MS/MS spectra of the protonated  $m/z$  1260 (F) and sodiated  $m/z$  1282 (G) parent ions of strain KA1179 ( $\Delta lit2 attB::pPL2-P_{Gram+}-lit2$ ). The elucidated structures of the diacylglycerol-modified and the lyso-form  $N$ -terminal peptides are shown in Fig. 2 (E and G, respectively). The diagnostic dehydroalanyl ions for the diacylglycerol-modified (triangle) and the lyso (circle) lipopeptide are indicated.

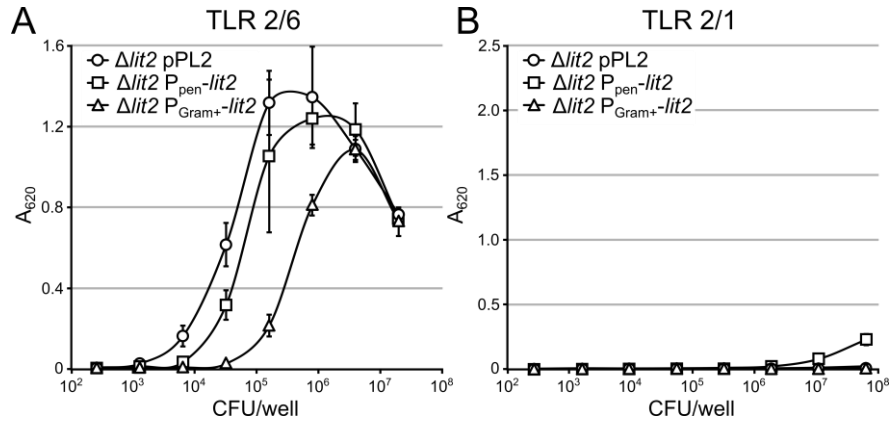

**Fig S8** TLR2 response to whole bacteria. (A) HEK-Blue-TLR2/1 cells were exposed to 5-fold dilutions of heat-inactivated, whole bacteria cells of the *L. monocytogenes* CFSAN023459  $\Delta lit2$  derivative strains with the pPL2 empty vector, or *lit2* under the control of the P<sub>pen</sub> or P<sub>Gram+</sub> promoters, integrated into the chromosome. (B) HEK-Blue-TLR2/6 cells were exposed to the same bacterial cell preparations as in panel A. The data are shown as the mean  $\pm$  the standard deviation of three biological replicates.

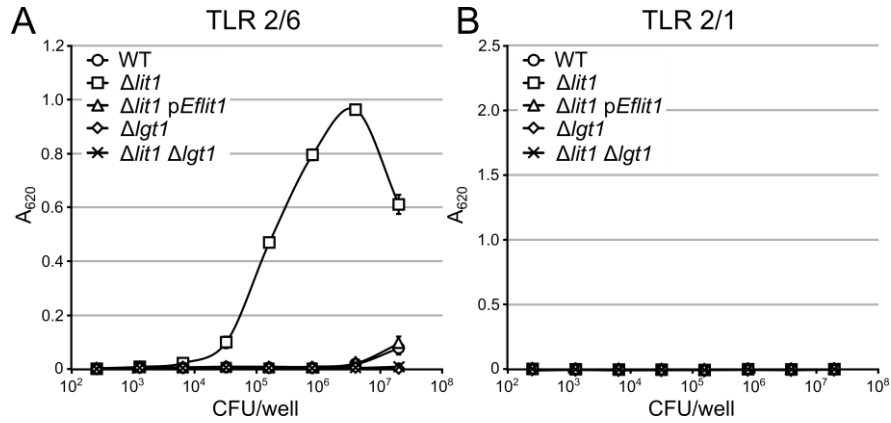

**Fig S9** TLR2 response to whole bacteria. (A) HEK-Blue-TLR2/6 cells were exposed to 5-fold dilutions of heat-inactivated, whole bacteria cells of *Enterococcus faecalis* ATCC 19433 and the indicated derivatives. (B) HEK-Blue-TLR2/1 cells were exposed to the same bacterial cell preparations as in panel A. The data are shown as the mean  $\pm$  the standard deviation of three biological replicates.
